# Supplementary material for: Three-dimensional nephrometry scoring system: a precise scoring system to evaluate complexity of renal tumors suitable for partial nephrectomy
Source: PeerJ. 2020 Feb 27;8:e8637. doi: 10.7717/peerj.8637 (PMC7049461; doi:10.7717/peerj.8637)
Supplement: Supplemental Information 1 [file peerj-08-8637-s001.xlsx]

## Sheet: Data
3D score	R.E.N.A.L score	PADUA score	CI score	WIT	score of Tumor volume	age	gender	lateral location	locational face	score of 3D Endo/exophytic rate	score of LDTE	score of UCS/sinus involvement	score of Vascular variation
7	5	6	3.73	29	2	27	1	1	1	2	1	1	1
6	6	7	0	27	1	28	1	1	1	2	1	1	1
6	6	7	2.95	23	1	30	1	2	1	1	2	1	1
8	8	9	3.28	29	1	31	1	2	1	3	2	1	1
7	5	7	3.35	29	2	31	1	2	1	2	1	1	1
7	7	8	2.51	28	2	34	1	2	1	1	2	1	1
7	5	12	1.35	26	1	37	1	1	2	2	2	1	1
8	8	9	2.48	29	2	37	1	2	2	2	1	2	1
5	6	6	3.95	22	1	40	1	2	1	1	1	1	1
10	9	10	1.91	30	3	40	1	2	2	2	2	2	1
10	8	8	1.52	30	3	42	1	2	1	1	3	1	2
7	6	8	6.12	25	2	43	1	2	1	1	2	1	1
7	6	6	3.73	26	2	43	1	2	2	1	1	1	2
7	4	6	7	27	1	44	1	2	1	2	2	1	1
6	6	7	3.71	28	2	44	1	2	2	1	1	1	1
7	6	7	2.79	24	2	44	1	2	1	1	2	1	1
5	10	9	1	25	1	45	1	2	2	1	1	1	1
8	7	7	5.78	27	1	45	1	2	2	2	2	1	2
11	9	8	1	32	3	45	1	1	1	1	3	3	1
11	10	6	2.56	35	1	46	1	2	1	3	3	2	2
8	9	9	2.13	29	2	46	1	1	1	3	1	1	1
8	5	7	3.79	29	2	47	1	2	1	2	1	1	2
10	8	9	2.3	29	2	47	1	1	2	2	2	2	2
12	9	9	1.54	32	3	47	1	2	1	2	3	2	2
8	9	8	7.67	35	1	48	1	1	1	2	3	1	1
9	9	9	1.47	25	1	48	1	1	1	2	3	2	1
12	8	11	1.15	32	3	48	1	1	1	2	3	3	1
7	7	8	2.79	27	1	49	1	1	1	2	2	1	1
5	10	7	2.34	25	1	50	1	2	2	1	1	1	1
8	6	7	3.12	29	2	51	1	2	2	2	2	1	1
9	8	9	2.27	29	1	52	1	1	2	3	2	2	1
9	8	8	2.1	40	2	52	1	2	2	2	2	1	2
7	5	7	2.55	29	3	52	1	1	1	1	1	1	1
11	9	10	1.25	30	3	52	1	2	1	2	3	2	1
6	5	10	4.06	24	1	53	1	1	1	1	2	1	1
9	10	9	2.8	40	1	53	1	1	1	3	3	1	1
8	4	7	1.28	29	2	53	1	1	1	2	2	1	1
9	8	8	2.12	30	3	53	1	2	1	1	2	1	2
12	8	10	1.74	30	3	53	1	1	1	2	3	3	1
7	7	7	4.92	35	1	54	1	1	2	1	3	1	1
7	7	8	2.85	28	2	54	1	2	1	1	2	1	1
8	7	7	2.18	29	2	54	1	1	1	2	2	1	1
10	7	8	1.86	40	2	54	1	1	2	2	3	1	2
7	5	6	3.73	27	1	55	1	2	2	2	2	1	1
7	6	8	4.3	27	1	55	1	2	1	2	2	1	1
11	8	9	1.71	30	3	55	1	2	1	2	2	2	2
6	7	8	3.37	21	1	56	1	1	2	1	2	1	1
8	9	9	1.99	22	1	56	1	1	1	2	3	1	1
12	5	7	4.74	33	3	56	1	2	2	2	3	3	1
12	8	9	12.71	32	3	56	1	2	1	2	2	3	2
9	8	9	4.07	29	1	57	1	2	1	3	1	2	2
12	9	12	1.72	32	3	57	1	2	1	3	2	3	1
12	8	9	1.97	31	3	57	1	2	2	2	3	2	2
7	9	8	6.61	35	1	58	1	1	1	1	3	1	1
8	10	9	2.45	23	1	58	1	1	1	2	3	1	1
8	5	7	4.78	38	1	58	1	1	1	1	3	1	2
6	5	7	2.99	24	2	58	1	1	2	1	1	1	1
9	8	9	2.11	29	1	59	1	1	1	3	3	1	1
7	9	11	2.96	29	2	59	1	1	2	2	1	1	1
7	5	7	2.45	29	3	59	1	2	2	1	1	1	1
10	8	9	1.69	30	3	59	1	1	1	2	2	2	1
9	8	11	2.25	37	2	60	1	2	1	2	1	3	1
8	5	6	2.43	30	3	60	1	1	1	1	2	1	1
11	9	13	0.5	30	3	60	1	1	2	1	3	3	1
9	9	8	1.29	26	2	61	1	1	2	2	3	1	1
11	10	12	1	37	2	61	1	1	1	2	3	3	1
9	7	9	2.56	30	3	61	1	2	1	1	2	2	1
10	7	10	1.81	10	1	62	1	2	2	2	3	3	1
10	8	9	1.64	29	2	62	1	1	1	2	2	2	2
8	8	8	3.19	38	1	63	1	2	2	2	3	1	1
6	6	7	6.22	27	1	64	1	2	2	2	1	1	1
7	7	7	2.59	29	2	65	1	2	1	2	1	1	1
9	6	8	2.96	40	2	65	1	2	2	2	2	1	2
11	6	9	6.17	30	3	65	1	1	1	2	3	2	1
7	4	6	2.6	29	2	66	1	1	1	2	1	1	1
7	7	8	6.57	29	1	67	1	1	1	3	1	1	1
8	5	7	3.36	29	2	67	1	1	2	2	2	1	1
6	5	7	3.46	27	1	70	1	2	2	2	1	1	1
8	6	7	3.95	29	2	70	1	2	2	2	1	1	2
13	10	12	1.45	30	3	70	1	1	2	2	3	3	2
10	10	10	2.81	25	1	71	1	1	1	2	3	2	2
7	4	6	3.58	29	2	71	1	1	2	2	1	1	1
9	8	9	2.02	30	3	71	1	1	2	1	2	2	1
10	7	8	2.71	30	3	71	1	2	2	2	2	2	1
8	6	7	2.91	28	2	72	1	1	2	2	2	1	1
11	8	9	2.19	27	2	72	1	2	1	2	3	2	2
7	4	12	3.82	26	1	75	1	1	2	2	2	1	1
8	9	8	1.61	23	1	75	1	1	2	2	3	1	1
8	7	8	1.72	24	2	78	1	1	1	1	3	1	1
7	6	6	4.15	27	1	79	1	2	1	2	2	1	1
7	7	8	2.76	29	2	24	2	2	2	2	1	1	1
10	4	6	2.61	30	3	31	2	1	1	1	3	2	1
10	8	9	2.03	27	2	35	2	1	2	2	3	2	1
6	4	6	2.88	28	2	37	2	2	2	1	1	1	1
9	6	7	3.23	38	1	38	2	2	1	2	3	1	2
11	4	11	1.85	30	1	38	2	1	1	3	3	3	1
6	5	7	4.94	24	1	44	2	1	1	1	2	1	1
8	5	7	2.67	30	3	44	2	1	2	2	1	1	1
13	10	12	1	30	2	45	2	1	2	3	3	3	2
6	7	8	6.58	23	1	46	2	1	1	1	2	1	1
11	10	11	0.5	33	3	47	2	1	1	1	3	3	1
7	7	7	4.72	27	1	48	2	1	2	2	1	1	2
8	6	7	3.55	38	1	49	2	1	1	2	3	1	1
8	8	8	1.96	29	2	49	2	1	2	2	2	1	1
8	6	8	2.97	27	1	50	2	2	2	2	2	1	2
8	7	8	2.31	29	2	50	2	2	2	2	1	2	1
7	5	7	2.69	27	1	51	2	2	1	2	1	1	2
9	10	12	7.39	38	2	52	2	2	1	1	2	3	1
11	6	7	0	35	2	52	2	1	2	3	3	2	1
11	9	10	2.74	35	2	52	2	2	1	3	2	2	2
5	5	7	6.35	25	1	53	2	1	1	1	1	1	1
13	6	6	2.17	30	3	53	2	2	1	2	3	3	2
7	8	8	3.67	27	1	54	2	1	2	2	2	1	1
7	6	6	3.43	29	2	56	2	1	1	2	1	1	1
11	9	11	0.3	30	3	56	2	1	2	1	3	3	1
6	4	6	4.89	26	1	57	2	1	2	2	1	1	1
9	8	7	1.62	26	2	57	2	1	1	2	3	1	1
6	6	8	2.9	27	1	59	2	2	1	2	1	1	1
7	8	8	9.54	29	1	59	2	2	2	3	1	1	1
6	6	8	3	26	1	60	2	2	1	2	1	1	1
6	6	8	4.92	27	1	60	2	1	2	2	1	1	1
7	7	7	2.55	25	2	60	2	1	2	1	2	1	1
6	5	7	8.47	24	1	61	2	1	1	1	1	1	2
12	9	12	1.21	31	3	61	2	1	1	2	3	3	1
7	7	9	5.04	27	1	62	2	2	2	2	2	1	1
8	7	8	2.44	28	2	63	2	2	1	2	2	1	1
9	4	6	2.54	30	3	64	2	2	2	2	2	1	1
5	7	7	2.69	25	1	66	2	1	1	1	1	1	1
7	5	8	3.79	27	1	66	2	1	1	2	2	1	1
5	9	11	6.17	25	1	67	2	1	1	1	1	1	1
11	9	9	1.72	27	2	67	2	2	1	2	3	2	2
7	7	7	2.82	28	2	68	2	1	2	1	2	1	1
6	7	7	2.97	27	2	75	2	1	2	1	1	1	1
7	5	7	2.82	27	2	75	2	2	1	1	2	1	1
8	8	7	2.56	25	2	79	2	1	2	1	3	1	1
